# Supplementary material for: Gas chromatography (GC) fingerprinting and immunomodulatory activity of polysaccharide from the rhizome of Menispermum dauricum DC
Source: PeerJ journal article supplement (doi:10.7717/peerj.13946), 2022-08-22
Supplement: Raw_date.zip [file Common peak area.xlsx]

## Sheet: Sheet1
		Peak 1	Peak 2	Peak 3	Peak 4	Peak 5	Peak 6	Peak 7	Peak 8	Peak 9	Peak 10	Peak 11
	S1	69.23	24.05	8.52	5.03	10.1	4.8	2.84	15.35	93.35	37.69	103.65
	S2	109.01	31.4	13.98	4.76	14.63	6.41	3.79	18.5	135.66	49.82	216.39
	S3	99.54	38.68	13.56	5.52	15.21	6.28	4.01	23.25	190.33	45.44	187.88
	S4	85.78	24.81	8.58	2.98	12.84	3.76	2.93	19.08	126.86	40.26	123.51
	S5	86.24	28.42	9.34	6.13	13.62	7.41	2.8	23.35	155.28	35.54	158.5
	S6	106.29	51.16	16.24	5.27	20.61	7.21	3.61	18.36	198.01	38.91	201.2
	S7	90.65	31.8	13.18	6.65	12.55	7.4	3.15	23.82	173.05	38.39	169.31
	S8	103.84	28.38	11.48	5.52	17.5	7.4	3.32	19.88	136.98	51.45	239.59
	S9	87.85	27.33	11.16	4.58	13.74	5.58	2.95	14.11	185.91	26.4	16.24
	S10	124.96	54.88	17.69	5.9	18.63	7.15	3.9	24.86	218.97	56.25	181.08
		Peak 1	Peak 2	Peak 3	Peak 4	Peak 8	Peak 9	Peak 10
	S1	69.23	24.05	8.52	5.03	15.35	93.35	37.69
	S2	109.01	31.4	13.98	4.76	18.5	135.66	49.82
	S3	99.54	38.68	13.56	5.52	23.25	190.33	45.44
	S4	85.78	24.81	8.58	2.98	19.08	126.86	40.26
	S5	86.24	28.42	9.34	6.13	23.35	155.28	35.54
	S6	106.29	51.16	16.24	5.27	18.36	198.01	38.91
	S7	90.65	31.8	13.18	6.65	23.82	173.05	38.39
	S8	103.84	28.38	11.48	5.52	19.88	136.98	51.45
	S9	87.85	27.33	11.16	4.58	14.11	185.91	26.4
	S10	124.96	54.88	17.69	5.9	24.86	218.97	56.25
