# Supplementary material for: Gas chromatography (GC) fingerprinting and immunomodulatory activity of polysaccharide from the rhizome of Menispermum dauricum DC
Source: PeerJ journal article supplement (doi:10.7717/peerj.13946), 2022-08-22
Supplement: Raw_date.zip [file Fig.1.xlsx]

## Sheet: Sheet1
Single-factor experiments
Liquid-solid ratio A			Extraction time B			Extraction temperature C
Ratio	Extraction yield (%)	Average	Time	Extraction yield (%)		Temperature	Extraction yield (%)
5mL/g	1.052	1.056	40min	0.948	1.01	60℃	0.883	0.93
	1.047			1.11			0.939
	1.069			0.972			0.968
10mL/g	1.147	1.178	80min	1.396	1.39	70℃	1.237	1.24
	1.179			1.373			1.255
	1.208			1.401			1.228
15mL/g	1.366	1.387	120min	1.644	1.61	80℃	1.609	1.58
	1.391			1.605			1.591
	1.404			1.581			1.54
20mL/g	1.449	1.45	160min	1.561	1.55	90℃	1.722	1.75
	1.483			1.57			1.753
	1.418			1.519			1.775
25mL/g	1.137	1.13	200min	1.521	1.5	100℃	1.638	1.64
	1.142			1.489			1.653
	1.111			1.49			1.629
Three-factor three-level response surface
Run	A (mL/g)	B (min)	C (℃)	Extraction yield (%)			Average
1	20	160	100	1.372	1.413	1.385	1.39
2	20	120	90	1.786	1.801	1.723	1.77
3	25	120	100	1.248	1.277	1.255	1.26
4	25	160	90	1.204	1.24	1.246	1.23
5	20	120	90	1.693	1.792	1.825	1.77
6	25	80	90	1.275	1.242	1.263	1.26
7	20	120	90	1.801	1.739	1.74	1.76
8	15	80	90	1.38	1.299	1.341	1.34
9	15	120	80	1.406	1.441	1.443	1.43
10	15	160	90	1.212	1.309	1.319	1.28
11	20	80	80	1.539	1.627	1.634	1.6
12	20	120	90	1.755	1.81	1.715	1.76
13	20	160	80	1.567	1.501	1.522	1.53
14	20	120	90	1.783	1.824	1.763	1.79
15	25	120	80	1.366	1.357	1.477	1.4
16	20	80	100	1.544	1.508	1.418	1.49
17	15	120	100	1.327	1.35	1.343	1.34
