# Supplementary material for: Gas chromatography (GC) fingerprinting and immunomodulatory activity of polysaccharide from the rhizome of Menispermum dauricum DC
Source: PeerJ journal article supplement (doi:10.7717/peerj.13946), 2022-08-22
Supplement: Raw_date.zip [file Fig.4.xlsx]

## Sheet: Sheet1
Cell Viability		OD value	P value
	Control	0.893
		0.871
		0.879
	LPS	1.08	1.20749e-05	Compared with Control group
		1.094
		1.093
	10μg/mL MDP	1.05	4.12962e-05	Compared with Control group
		1.066
		1.073
	50μg/mL MDP	1.097	1.06603e-05	Compared with Control group
		1.088
		1.083
	100μg/mL MDP	1.052	2.47462e-05	Compared with Control group
		1.047
		1.039
	200μg/mL MDP	1.151	3.51836e-06	Compared with Control group
		1.147
		1.139
	400μg/mL MDP	1.012	9.77198e-05	Compared with Control group
		1.001
		1.019
