# Supplementary material for: Gas chromatography (GC) fingerprinting and immunomodulatory activity of polysaccharide from the rhizome of Menispermum dauricum DC
Source: PeerJ journal article supplement (doi:10.7717/peerj.13946), 2022-08-22
Supplement: Raw_date.zip [file IL-6.xlsx]

## Sheet: Sheet1
IL-6			OD value	P value
	No TAK-242	Control	0.243
			0.241
			0.236
		LPS	0.314	2.96724e-05	Compared with Control group
			0.306
			0.307
		50μg/mL MDP	0.286	0.000192227	Compared with Control group
			0.285
			0.278
		100μg/mL MDP	0.295	6.51611e-05	Compared with Control group
			0.288
			0.29
		200μg/mL MDP	0.299	7.83639e-05	Compared with Control group
			0.291
			0.292
	TAK-242	Control	0.238
			0.233
			0.249
		LPS	0.258	0.183079	Compared with Control group
			0.247
			0.245
		50μg/mL MDP	0.239	0.329866	Compared with Control group
			0.255
			0.248
		100μg/mL MDP	0.261	0.0780671	Compared with Control group
			0.252
			0.249
		200μg/mL MDP	0.239	0.349709	Compared with Control group
			0.245
			0.266
