# Supplementary material for: Gas chromatography (GC) fingerprinting and immunomodulatory activity of polysaccharide from the rhizome of Menispermum dauricum DC
Source: PeerJ journal article supplement (doi:10.7717/peerj.13946), 2022-08-22
Supplement: Raw_date.zip [file MyD88.xlsx]

## Sheet: Sheet1
1	MyD88	GAPDH	MyD88/GAPDH			MyD88/GAPDH	P value
Control	42843.6	56060.5	0.764238		Control	0.764238
LPS	47861.1	49913.4	0.958883			0.74599
50μg/mL MDP	43704.1	49024.8	0.89147			0.813998
					LPS	0.958883	0.00188848	Compared with Control group
						1.0293
2	MyD88	GAPDH	MyD88/GAPDH			1.03675
Control	39402.3	52818.7	0.74599		50μg/mL MDP	0.89147	0.0171911	Compared with Control group
LPS	46926.3	45590.6	1.0293			1.0314
50μg/mL MDP	46176.2	44770.4	1.0314			1.06051
3	MyD88	GAPDH	MyD88/GAPDH
Control	36366.1	44675.9	0.813998
LPS	53030.4	51150.7	1.03675
50μg/mL MDP	44435.9	41900.3	1.06051
