# Supplementary material for: Gas chromatography (GC) fingerprinting and immunomodulatory activity of polysaccharide from the rhizome of Menispermum dauricum DC
Source: PeerJ journal article supplement (doi:10.7717/peerj.13946), 2022-08-22
Supplement: Raw_date.zip [file NO.xlsx]

## Sheet: Sheet1
NO			OD value	P value
	No TAK-242	Control	0.314
			0.291
			0.319
		LPS	0.419	0.000630918	Compared with Control group
			0.454
			0.438
		50μg/mL MDP	0.374	0.00363846	Compared with Control group
			0.359
			0.368
		100μg/mL MDP	0.386	0.00281065	Compared with Control group
			0.37
			0.369
		200μg/mL MDP	0.404	0.000865161	Compared with Control group
			0.391
			0.39
	TAK-242	Control	0.293
			0.299
			0.317
		LPS	0.286	0.402114	Compared with Control group
			0.301
			0.298
		50μg/mL MDP	0.319	0.244167	Compared with Control group
			0.307
			0.316
		100μg/mL MDP	0.29	0.761638	Compared with Control group
			0.31
			0.3
		200μg/mL MDP	0.316	0.253583	Compared with Control group
			0.309
			0.314
