# Supplementary material for: Gas chromatography (GC) fingerprinting and immunomodulatory activity of polysaccharide from the rhizome of Menispermum dauricum DC
Source: PeerJ journal article supplement (doi:10.7717/peerj.13946), 2022-08-22
Supplement: Raw_date.zip [file p-ERK-ERK.xlsx]

## Sheet: Sheet1
1	p-ERK	GAPDH	p-ERK/GAPDH	ERK	GAPDH	ERK/GAPDH	p-ERK/ERK			p-ERK/ERK	P value
Control	34678.4	53388.7	0.649545	45757.3	47270.2	0.967995	0.671021		Control	0.671021
LPS	53171.4	47984.9	1.10809	46298.1	53026.6	0.873112	1.26912			0.468339
50μg/mL MDP	50769.5	43554.1	1.16567	47466.6	51155.7	0.927885	1.25626			0.522861
									LPS	1.26912	0.00526918	Compared with Control group
										0.976772
2	p-ERK	GAPDH	p-ERK/GAPDH	ERK	GAPDH	ERK/GAPDH	p-ERK/ERK			1.13733
Control	23765	50734.1	0.468422	52572.7	52563.4	1.00018	0.468339		50μg/mL MDP	1.25626	0.0054067	Compared with Control group
LPS	48101.2	51437.3	0.935141	46291.8	48352.6	0.957379	0.976772			1.07167
50μg/mL MDP	53043.6	50084.4	1.05909	50518.9	51119	0.98826	1.07167			1.46957
3	p-ERK	GAPDH	p-ERK/GAPDH	ERK	GAPDH	ERK/GAPDH	p-ERK/ERK
Control	22653.7	47697.9	0.474941	48021.5	52866.7	0.908351	0.522861
LPS	52268.5	54947.3	0.951248	44686.8	53428.3	0.836388	1.13733
50μg/mL MDP	55912	42204	1.3248	46719.9	51825.1	0.901493	1.46957
