# Supplementary material for: Gas chromatography (GC) fingerprinting and immunomodulatory activity of polysaccharide from the rhizome of Menispermum dauricum DC
Source: PeerJ journal article supplement (doi:10.7717/peerj.13946), 2022-08-22
Supplement: Raw_date.zip [file p-JNK-JNK.xlsx]

## Sheet: Sheet1
1	p-JNK	GAPDH	p-JNK/GAPDH	JNK	GAPDH	JNK/GAPDH	p-JNK/JNK			p-JNK/JNK	P value
Control	27630.4	49938.8	0.553285	41981.2	50794.7	0.826488	0.669441		Control	0.669441
LPS	46542.9	48006	0.969523	48782.8	46872	1.04077	0.931546			0.444431
50μg/mL MDP	36438	40611.2	0.897241	44615.1	44012.2	1.0137	0.885116			0.52831
									LPS	0.931546	0.0102393	Compared with Control group
										0.897587
2	p-JNK	GAPDH	p-JNK/GAPDH	JNK	GAPDH	JNK/GAPDH	p-JNK/JNK			0.820381
Control	26407.6	53746	0.49134	45780.5	41409.8	1.10555	0.444431		50μg/mL MDP	0.885116	0.00671436	Compared with Control group
LPS	52230.4	49097.5	1.06381	47953.4	40460.5	1.18519	0.897587			0.988052
50μg/mL MDP	50013	48972.1	1.02125	45649.8	44165.6	1.0336	0.988052			0.899809
3	p-JNK	GAPDH	p-JNK/GAPDH	JNK	GAPDH	JNK/GAPDH	p-JNK/JNK
Control	18232	35319.1	0.516209	46237.1	47321	0.977095	0.52831
LPS	45770.8	50545.5	0.905537	52772	47809.4	1.1038	0.820381
50μg/mL MDP	39394.9	44219.3	0.890898	39919.7	40319	0.990097	0.899809
