# Supplementary material for: Gas chromatography (GC) fingerprinting and immunomodulatory activity of polysaccharide from the rhizome of Menispermum dauricum DC
Source: PeerJ journal article supplement (doi:10.7717/peerj.13946), 2022-08-22
Supplement: Raw_date.zip [file p-NFKB-NFKB.xlsx]

## Sheet: Sheet1
1	p-NFKB	GAPDH	p-NFKB/GAPDH	NFKB	GAPDH	NFKB/GAPDH	p-NFKB/NFKB			p-NFKB/NFKB	P value
Control	30171.2	54313.6	0.5555	44702	52507.4	0.851346	0.652496		Control	0.652496
LPS	57695.6	51868.1	1.11235	50495.2	46630.2	1.08289	1.02721			0.630248
50μg/mL MDP	51028.9	51487	0.991104	39857.5	43104.7	0.924666	1.07185			0.815518
									LPS	1.02721	0.0352464	Compared with Control group
										0.848018
2	p-NFKB	GAPDH	p-NFKB/GAPDH	NFKB	GAPDH	NFKB/GAPDH	p-NFKB/NFKB			0.957955
Control	32541.8	51552.4	0.631238	48357.5	48281.7	1.00157	0.630248		50μg/mL MDP	1.07185	0.0146088	Compared with Control group
LPS	44585.8	50342.1	0.885655	50123.1	47993.1	1.04438	0.848018			0.937908
50μg/mL MDP	39462.9	52261.1	0.755111	38243.3	47501.2	0.805101	0.937908			0.967722
3	p-NFKB	GAPDH	p-NFKB/GAPDH	NFKB	GAPDH	NFKB/GAPDH	p-NFKB/NFKB
Control	25925.7	43216.4	0.599904	37970.4	51617.4	0.735611	0.815518
LPS	50553	48585.4	1.0405	50587.5	46574.4	1.08616	0.957955
50μg/mL MDP	51938.6	53321.3	0.974069	42235.5	41960.3	1.00656	0.967722
