# Supplementary material for: Gas chromatography (GC) fingerprinting and immunomodulatory activity of polysaccharide from the rhizome of Menispermum dauricum DC
Source: PeerJ journal article supplement (doi:10.7717/peerj.13946), 2022-08-22
Supplement: Raw_date.zip [file p-P38-P38.xlsx]

## Sheet: Sheet1
1	p-P38	GAPDH	p-P38/GAPDH	P38	GAPDH	P38/GAPDH	p-P38/P38			p-P38/P38	P value
Control	40308.1	52195.8	0.772247	44986.1	40531	1.10992	0.695769		Control	0.695769
LPS	45881.3	41052	1.11764	46277.6	43913	1.05385	1.06053			0.718717
50μg/mL MDP	49121.9	43973.7	1.11707	44129.8	50615.1	0.871869	1.28124			0.678708
									LPS	1.06053	0.000336146	Compared with Control group
										1.0533
2	p-P38	GAPDH	p-P38/GAPDH	P38	GAPDH	P38/GAPDH	p-P38/P38			1.15353
Control	33071.4	51791.7	0.638546	37653.2	42380.7	0.888453	0.718717		50μg/mL MDP	1.28124	0.00677178	Compared with Control group
LPS	52385.2	48537.7	1.07927	44820.9	43742.6	1.02465	1.0533			1.01144
50μg/mL MDP	48388.1	48330.6	1.00119	46658.5	47136.3	0.989864	1.01144			1.32543
3	p-P38	GAPDH	p-P38/GAPDH	P38	GAPDH	P38/GAPDH	p-P38/P38
Control	42477.3	55454.9	0.76598	48543.5	43012.7	1.12858	0.678708
LPS	53208	43165.5	1.23265	45859.8	42916.2	1.06859	1.15353
50μg/mL MDP	48930.2	40879	1.19695	43843.5	48549.6	0.903066	1.32543
