# Supplementary material for: Gas chromatography (GC) fingerprinting and immunomodulatory activity of polysaccharide from the rhizome of Menispermum dauricum DC
Source: PeerJ journal article supplement (doi:10.7717/peerj.13946), 2022-08-22
Supplement: Raw_date.zip [file Supplementary Instructions.docx]

The CDF files in Fig. 2 are the data of analyzing the fingerprints of 10 batches of the rhizome of *M. dauricum* Polysaccharide. The software to open this file is the Similarity Evaluation System for Chromatographic Fingerprint of Traditional Chinese Medicine, and the software installation package has been added to the folder in Fig. 2.

The OPJU file in Fig. 3 is the data of PCA analysis, and the open software is Origin, which can be downloaded and used for a fee from the Origin official website.
