# Supplementary material for: Gas chromatography (GC) fingerprinting and immunomodulatory activity of polysaccharide from the rhizome of Menispermum dauricum DC
Source: PeerJ journal article supplement (doi:10.7717/peerj.13946), 2022-08-22
Supplement: Raw_date.zip [file TLR4.xlsx]

## Sheet: Sheet1
1	TLR4	GAPDH	TLR4/GAPDH			TLR4/GAPDH	P value
Control	29155.9	47826.2	0.609622		Control	0.609622
LPS	48190.3	51052.4	0.943939			0.888448
50μg/mL MDP	50175.3	52559.7	0.954635			0.723369
					LPS	0.943939	0.0483151	Compared with Control group
						1.1361
2	TLR4	GAPDH	TLR4/GAPDH			0.983652
Control	40852.2	45981.6	0.888448		50μg/mL MDP	0.954635	0.0435034	Compared with Control group
LPS	50746.1	44667.1	1.1361			0.990579
50μg/mL MDP	49201.6	49669.6	0.990579			0.991819
3	TLR4	GAPDH	TLR4/GAPDH
Control	31905.6	44106.9	0.723369
LPS	49980.9	50811.6	0.983652
50μg/mL MDP	53623.8	54066.1	0.991819
