# Supplementary material for: Gas chromatography (GC) fingerprinting and immunomodulatory activity of polysaccharide from the rhizome of Menispermum dauricum DC
Source: PeerJ journal article supplement (doi:10.7717/peerj.13946), 2022-08-22
Supplement: Raw_date.zip [file TNF-α.xlsx]

## Sheet: Sheet1
TNF-α			OD value	P value
	No TAK-242	Control	0.176
			0.189
			0.187
		LPS	0.264	6.66766e-05	Compared with Control group
			0.271
			0.263
		50μg/mL MDP	0.21	0.0091286	Compared with Control group
			0.206
			0.202
		100μg/mL MDP	0.227	0.00740051	Compared with Control group
			0.222
			0.208
		200μg/mL MDP	0.217	0.00265712	Compared with Control group
			0.219
			0.23
	TAK-242	Control	0.19
			0.184
			0.172
		LPS	0.184	0.258771	Compared with Control group
			0.193
			0.193
		50μg/mL MDP	0.188	0.428884	Compared with Control group
			0.19
			0.183
		100μg/mL MDP	0.22	0.522533	Compared with Control group
			0.23
			0.15
		200μg/mL MDP	0.194	0.0527945	Compared with Control group
			0.199
			0.198
